# Supplementary material
Source: ML conference proceedings conference paper supplement (https://proceedings.neurips.cc/paper_files/paper/2019/hash/091bc5440296cc0e41dd60ce22fbaf88-Abstract.html)
Supplement: Supplementary file [file 091bc5440296cc0e41dd60ce22fbaf88-Supplemental.zip]

## A Convergence proofs

**Lemma 2.** Suppose  $X$  and  $Y$  are r.v.s having CDFs  $F_1$  and  $F_2$ , respectively. Then,

$$\sup |\mathbb{E}(f(X)) - \mathbb{E}(f(Y))| = W_1(F_1, F_2) = \int_{-\infty}^{\infty} |F_1(s) - F_2(s)| ds = \int_0^1 |F_1^{-1}(\beta) - F_2^{-1}(\beta)| d\beta, \quad (14)$$

where the supremum in (2) is over all functions  $f : \mathbb{R} \rightarrow \mathbb{R}$  that are 1-Lipschitz.

*Proof.* The first equality in (14) is given by the Kantorovich-Rubinstein theorem (see [Givens and Shortt, 1984, Edwards, 2011]). The second equality is given in [Vallander, 1974].

To prove the third inequality in (14), we note that the integral on the left hand side of the third inequality is unchanged if we replace  $F_1$  and  $F_2$  by the pointwise maximum and minimum, respectively, of  $F_1$  and  $F_2$ . Hence, without loss of generality, we may assume that  $F_1(s) \geq F_2(s)$  for all  $s \in \mathbb{R}$ . The integral in question then reduces to

$$\int_{-\infty}^{\infty} |F_1(s) - F_2(s)| ds = \int_{-\infty}^{\infty} (F_1(s) - F_2(s)) ds = \int_{-\infty}^{\infty} \int_{F_2(s)}^{F_1(s)} d\beta ds. \quad (15)$$

It can easily be shown from the definition of the generalized inverse that

$$\begin{aligned} \{(\beta, s) \in \mathbb{R}^2 : F_2(s) < \beta < F_1(s)\} &\subseteq \{(\beta, s) \in \mathbb{R}^2 : F_1^{-1}(\beta) \leq s \leq F_2^{-1}(\beta)\} \\ &\subseteq \{(\beta, s) \in \mathbb{R}^2 : F_2(s) \leq \beta \leq F_1(s)\}. \end{aligned}$$

This justifies interchanging the order of integration (see Theorem 14.14 of Apostol [1974]) in (15), which yields

$$\int_{-\infty}^{\infty} |F_1(s) - F_2(s)| ds = \int_0^1 \int_{F_1^{-1}(\beta)}^{F_2^{-1}(\beta)} ds d\beta = \int_0^1 [F_2^{-1}(\beta) - F_1^{-1}(\beta)] d\beta. \quad (16)$$

The third inequality in (14) now follows by noting that, under our assumption that  $F_1(s) \geq F_2(s)$  for all  $s \in \mathbb{R}$ , we have  $F_2^{-1}(\beta) \geq F_1^{-1}(\beta)$  for all  $\beta \in [0, 1]$ .  $\square$

### A.1 Proof of Proposition 1

*Proof.* Consider the event  $A = \{W_1(F_n, F) \leq (1 - \alpha)\epsilon\}$ , where  $F_n$  is as defined in (5). Lemma 1 provides a lower bound on  $\mathbb{P}(A)$  depending on whether the r.v.s satisfy (C1) or (C2). In particular, we have

$$\mathbb{P}(A) \geq 1 - B(n, (1 - \alpha)\epsilon), \quad (17)$$

where  $B(\cdot, \cdot)$  is as defined in Lemma 1.

Applying Lemma 2, we have on the event  $A$ ,

$$\left| \int_{\mathbb{R}} f(x) dF(x) - \int_{\mathbb{R}} f(x) dF_n(x) \right| \leq (1 - \alpha)\epsilon, \quad (18)$$

for any 1-Lipschitz function  $f : \mathbb{R} \rightarrow \mathbb{R}$ .

Choose  $\xi \in \mathbb{R}$  arbitrarily and let  $g_{\xi}(x) = (1 - \alpha)\xi + (x - \xi)^+$ . Then,

$$\begin{aligned} \int_{\mathbb{R}} g_{\xi}(x) dF(x) &= (1 - \alpha)\xi + \mathbb{E}(X - \xi)^+ \triangleq D(\xi), \text{ and} \\ \int_{\mathbb{R}} g_{\xi}(x) dF_n(x) &= (1 - \alpha)\xi + \frac{1}{n} \sum_{i=1}^n (X_i - \xi)^+ \triangleq D_n(\xi). \end{aligned}$$

Observing that  $g_{\xi}$  is 1-Lipschitz in  $x$  for every  $\xi \in \mathbb{R}$  and using (18), we obtain

$$|D(\xi) - D_n(\xi)| \leq (1 - \alpha)\epsilon, \text{ on } A, \text{ for any } \xi \in \mathbb{R}.$$

358 Choose  $m > 0$  arbitrarily, and let  $\xi_1, \xi_2 \in \mathbb{R}$  be such that

$$D(\xi_1) \leq \inf_{\xi} D(\xi) + \frac{1}{m}, \text{ and } D_n(\xi_2) \leq \inf_{\xi} D_n(\xi) + \frac{1}{m}.$$

359 Then, on the event  $A$ , we have

$$\begin{aligned} -(1-\alpha)\epsilon - \frac{1}{m} &\leq D(\xi_1) - D_n(\xi_1) - \frac{1}{m} \leq \inf_{\xi} D(\xi) - \inf_{\xi} D_n(\xi) \\ &\leq D(\xi_2) - D_n(\xi_2) + \frac{1}{m} \leq (1-\alpha)\epsilon + \frac{1}{m}. \end{aligned}$$

360 Since the chain of inequalities above hold for any  $m > 0$ , we conclude that

$$\left| \inf_{\xi} D(\xi) - \inf_{\xi} D_n(\xi) \right| \leq (1-\alpha)\epsilon, \text{ on } A. \quad (19)$$

361 Notice that, by definition,  $\inf_{\xi} D(\xi) = (1-\alpha)C_{\alpha}(X)$  and  $\inf_{\xi} D_n(\xi) = (1-\alpha)C_n$ . Thus,

$$|C_{\alpha}(X) - C_n| \leq \epsilon, \text{ on the event } A.$$

362 The main claim now follows by using the bound on  $\mathbb{P}(A)$  in (17).  $\square$

### 363 A.2 Proof of Proposition 2

364 *Proof.* Consider the event  $A = \{W_1(F_n, F) \leq \epsilon/K\}$ , where  $F_n$  is as defined in (5). Lemma 1  
365 provides a lower bound on  $\mathbb{P}(A)$  depending on whether the r.v.s satisfy (C1) or (C2). In particular,  
366 we have

$$\mathbb{P}(A) \geq 1 - B(n, \epsilon/K), \quad (20)$$

367 where  $B(\cdot, \cdot)$  is as defined in Lemma 1.

368 Equation (10) implies that  $A \subseteq \{|m_{n,\phi} - M_{\phi}(X)| \leq \epsilon\}$ . The main claim now follows by using the  
369 bound on  $\mathbb{P}(A)$  in (20).  $\square$

### 370 A.3 Proof of Proposition 3

371 *Proof.* Let

$$\Delta_n^+ = \int_0^{\infty} w^+ (\mathbb{P}(u^+(X) > z)) dz - \int_0^{\infty} w^+ (1 - \hat{F}_n^+(z)) dz. \quad (21)$$

372 The quantity above is the difference between the first integral in CPT-value estimate (13) and the first  
373 integral in the CPT-value (11). Using (C3), we have

$$|\Delta_n^+| \leq L \int_0^{\infty} |F^+(z) - \hat{F}_n^+(z)|^{\alpha} dz, \quad (22)$$

374 where  $F^+(\cdot)$  is the CDF of the r.v.  $u^+(X)$ .

375 Recall that the r.v.  $u^+(X)$  is bounded a.s. in  $[0, u^+(T_2)]$  by our assumptions on  $u^+$  and  $X$ . Applying  
376 Jensen's inequality to the concave  $x \mapsto x^{\alpha}$  after normalizing the Lebesgue measure on the interval  
377  $[0, u^+(T_2)]$ , we obtain

$$\begin{aligned} \frac{1}{u^+(T_2)} \int_0^{u^+(T_2)} |F^+(z) - \hat{F}_n^+(z)|^{\alpha} dz &\leq \left[ \frac{1}{u^+(T_2)} \int_0^{u^+(T_2)} |F^+(z) - \hat{F}_n^+(z)| dz \right]^{\alpha} \\ &\leq \left[ \frac{1}{u^+(T_2)} \int_{-\infty}^{\infty} |F^+(z) - \hat{F}_n^+(z)| dz \right]^{\alpha}. \end{aligned}$$

378 Applying the second equality in Lemma 2 to the CDFs  $F^+$  and  $\hat{F}_n^+$  gives

$$\int_0^{u^+(T_2)} |F^+(z) - \hat{F}_n^+(z)|^{\alpha} dz \leq [W_1(F^+, \hat{F}_n^+)]^{\alpha} [u^+(T_2)]^{1-\alpha}.$$

379 Using the bound obtained above in (22), we obtain

$$|\Delta_n^+| \leq L[W_1(F^+, \hat{F}_n^+)]^\alpha [u^+(T_2)]^{1-\alpha}.$$

380 Next, for any  $\epsilon > 0$ , consider the event  $A = \{W_1(F^+, \hat{F}_n^+) \leq [\epsilon/\{2L[u^+(T_2)]^{1-\alpha}\}]^{1/\alpha}\}$ . Then,  
381 from Lemma 1,

$$\mathbb{P}(A) \geq 1 - B(n, [\epsilon/\{2L[u^+(T_2)]^{1-\alpha}\}]^{1/\alpha}),$$

382 where  $B$  is as given in Lemma 1. On the event  $A$ , we have  $|\Delta_n^+| \leq \epsilon/2$ .

383 Along similar lines, letting  $\Delta_n^- = \int_0^\infty w^-(\mathbb{P}(u^-(X) > z)) dz - \int_0^\infty w^-(1 - \hat{F}_n^-(z)) dz$ , it is  
384 easy to infer that

$$|\Delta_n^-| \leq \epsilon/2 \text{ on the set } A' = \{W_1(F^-, \hat{F}_n^-) \leq [\epsilon/\{2L[u^-(T_1)]^{1-\alpha}\}]^{1/\alpha}\}, \quad (23)$$

385 where  $F^-(\cdot)$  is the CDF of  $u^-(X)$ . The main claim follows by using triangle inequality, that is,

$$\begin{aligned} \mathbb{P}(|C_n - C(X)| > \epsilon) &\leq \mathbb{P}(|\Delta_n^+| > \epsilon/2) + \mathbb{P}(|\Delta_n^-| > \epsilon/2) \\ &\leq [1 - \mathbb{P}(A)] + [1 - \mathbb{P}(A')] \\ &\leq B(n, [\epsilon/\{2L[u^+(T_2)]^{1-\alpha}\}]^{1/\alpha}) + B(n, [\epsilon/\{2L[u^-(T_1)]^{1-\alpha}\}]^{1/\alpha}) \\ &\leq 2B(n, [\epsilon/\{2LT^{1-\alpha}\}]^{1/\alpha}). \end{aligned}$$

386 This completes the proof.  $\square$

#### 387 A.4 Proof of Proposition 4

388 *Proof.* For some positive  $\tau_n$  to be specified later, we have

$$\begin{aligned} \Delta_n^+ &= \int_0^\infty w^+(\mathbb{P}(u^+(X) > z)) dz - \int_0^{\tau_n} w^+(1 - \hat{F}_n^+(z)) dz \\ &= \int_0^\infty w^+(1 - F^+(z)) dz - \int_0^{\tau_n} w^+(1 - F^+(z)) dz \\ &\quad + \int_0^{\tau_n} w^+(1 - F^+(z)) dz - \int_0^{\tau_n} w^+(1 - \hat{F}_n^+(z)) dz \\ &= I_1 + I_2, \end{aligned}$$

389 where

$$I_1 = \int_{\tau_n}^\infty w^+(1 - F^+(z)) dz, I_2 = \int_0^{\tau_n} w^+(1 - F^+(z)) dz - \int_0^{\tau_n} w^+(1 - \hat{F}_n^+(z)) dz.$$

390 For handling the first term in the RHS above, we start with the following observation:

$$\begin{aligned} I_1 &= \int_{\tau_n}^\infty w(\mathbb{P}(u^+(X) > z)) dz \leq L \int_{\tau_n}^\infty (\mathbb{P}(u^+(X) > z))^\alpha dz \leq 8L \int_{\tau_n}^\infty \frac{z}{\tau_n} \exp(-\alpha z^2/2) dz \\ &= \frac{8L}{\tau_n} \frac{2}{\alpha} \exp(-\alpha \tau_n^2/2), \end{aligned}$$

391 where we used the following facts: (i)  $w$  is Hölder continuous; (ii)  $w(0) = 0$ ; and (iii) a tail bound  
392 for the sub-Gaussian r.v.  $u^+(X)$ .

393 The second term, i.e.,  $I_2$  is bounded as follows:

$$\mathbb{P}(I_2 > \epsilon) \leq B\left(n, \left(\frac{\epsilon}{L\tau_n^{(1-\alpha)}}\right)^{1/\alpha}\right) = C \exp\left(-\frac{cn\epsilon^{2/\alpha}}{\tau_n^{2/\alpha}}\right).$$

$$\text{Or, equivalently } I_2 \leq \tau_n \left(\frac{\log(C/\delta)}{cn}\right)^{\alpha/2} \text{ w.p. } 1 - \delta.$$

where the inequality above follows by applying Proposition 3 to the r.v.  $Z = \max(u^+(X), \tau_n)$ , which takes values in the bounded interval  $[0, \tau_n]$ . Using the bounds on  $I_1$  and  $I_2$ , w.p.  $1 - \delta$ , we have

$$\Delta_n^+ \leq \frac{16L}{\alpha\tau_n} \exp(-\alpha\tau_n^2) + \tau_n \left( \frac{\log(C/\delta)}{cn} \right)^{\alpha/2}. \quad (24)$$

Setting  $\tau_n = \sqrt{\frac{1}{2} \log n}$ , we obtain

$$\Delta_n^+ \leq \frac{16L}{\alpha n^{\alpha/2}} + \sqrt{\frac{\log n}{2}} \left( \frac{\log(C/\delta)}{cn} \right)^{\alpha/2} \text{ w.p. } 1 - \delta,$$

leading to

$$\mathbb{P}(\Delta_n^+ > \epsilon) \leq C \exp \left( -cn \left( \frac{2}{\log n} \right)^{\frac{1}{\alpha}} \left( \epsilon - \frac{16L}{\alpha n^{\alpha/2}} \right)^{\frac{2}{\alpha}} \right).$$

The main claims by inferring a bound similar to the above for the second integrals in  $C_n$  and  $C(X)$  and then, using a triangle inequality as in the proof of Proposition 3.  $\square$

## B Proof of Theorem 1

*Proof.* The proof follows by using arguments analogous to that in the proof of Theorem 1 in [Auer et al., 2002]. For the sake of completeness, we provide the complete proof.

Let 1 denote the optimal arm, without loss of generality. We bound the number of pulls  $T_i(n)$  of any suboptimal arm  $i \neq 1$ . Fix a round  $t \in \{1, \dots, n\}$  and suppose that a sub-optimal arm  $i$  is pulled in this round. Then, we have

$$c_{i, T_i(t-1)} - \frac{2}{(1-\alpha)} \sqrt{\frac{\log(Ct)}{c T_i(t-1)}} \leq c_{1, T_1(t-1)} - \frac{2}{(1-\alpha)} \sqrt{\frac{\log(Ct)}{c T_1(t-1)}}. \quad (25)$$

The LCB-value of arm  $i$  can be larger than that of 1 *only if* one of the following three conditions holds:

**(1)  $c_{1, T_1(t-1)}$  is outside the confidence interval:**

$$c_{1, T_1(t-1)} - \frac{2}{(1-\alpha)} \sqrt{\frac{\log(Ct)}{c T_1(t-1)}} > C_\alpha(1), \quad (26)$$

**(2)  $c_{i, T_i(t-1)}$  is outside the confidence interval:**

$$c_{i, T_i(t-1)} + \frac{2}{(1-\alpha)} \sqrt{\frac{\log(Ct)}{c T_i(t-1)}} < C_\alpha(i), \quad (27)$$

**(3) Gap  $\Delta_i$  is small:** If we negate the two conditions above and use (25), then we obtain

$$\begin{aligned} C_\alpha(i) - \frac{4}{(1-\alpha)} \sqrt{\frac{\log(Ct)}{c T_i(t-1)}} &\leq c_{i, T_i(t-1)} - \frac{2}{(1-\alpha)} \sqrt{\frac{\log(Ct)}{c T_i(t-1)}} \\ &\leq c_{1, T_1(t-1)} - \frac{2}{(1-\alpha)} \sqrt{\frac{\log(Ct)}{c T_1(t-1)}} \leq C_\alpha(1) \\ \Rightarrow \Delta_i &< \frac{4}{(1-\alpha)} \sqrt{\frac{\log(Ct)}{c T_i(t-1)}} \text{ or } T_i(t-1) \leq \frac{16 \log(Ct)}{(1-\alpha)^2 \Delta_i^2} \end{aligned} \quad (28)$$

410 Let  $u = \frac{16 \log(Cn)}{(1-\alpha)^2 \Delta_i^2} + 1$ . When  $T_i(t-1) \geq u$ , i.e., when the condition in (28) does not hold, then  
 411 either (i) arm  $i$  is not pulled at time  $t$ , or (ii) (26) or (27) occurs. Thus, we have

$$\begin{aligned}
 T_i(n) &= 1 + \sum_{t=K+1}^n \mathbb{I}\{I_t = i\} \\
 &\leq u + \sum_{t=u+1}^n \mathbb{I}\{I_t = i; T_i(t-1) \geq u\} \\
 &\leq u + \sum_{t=u+1}^n \mathbb{I}\left\{c_{i, T_i(t-1)} - \frac{2}{(1-\alpha)} \sqrt{\frac{\log(Ct)}{c T_i(t-1)}} \right. \\
 &\quad \left. \leq c_{1, T_1(t-1)} - \frac{2}{(1-\alpha)} \sqrt{\frac{\log(Ct)}{c T_1(t-1)}}; T_i(t-1) \geq u\right\} \\
 &\leq u + \sum_{t=1}^{\infty} \sum_{s=1}^{t-1} \sum_{s_i=u}^{t-1} \mathbb{I}\left\{C_i(s_i) - \frac{2}{(1-\alpha)} \sqrt{\frac{\log(Ct)}{c s_i}} \leq C_1(s) - \frac{2}{(1-\alpha)} \sqrt{\frac{\log(Ct)}{c s}}\right\} \\
 &\leq u + \sum_{t=1}^{\infty} \sum_{s=1}^{t-1} \sum_{s_i=u}^{t-1} \mathbb{I}\left\{\left(C_\alpha(1) < C_1(s) - \frac{2}{(1-\alpha)} \sqrt{\frac{\log(Ct)}{c s}}\right) \right. \\
 &\quad \left. \text{or } \left(C_\alpha(i) > C_i(s_i) + \frac{2}{(1-\alpha)} \sqrt{\frac{\log(Ct)}{c s_i}}\right) \text{ occurs}\right\}.
 \end{aligned}$$

412 Using Proposition 1, we can bound the probability of occurrence of each of the two events inside the  
 413 indicator on the RHS of the final display above as follows:

$$\begin{aligned}
 \mathbb{P}\left(C_\alpha(1) < C_1(s) - \frac{2}{(1-\alpha)} \sqrt{\frac{\log(Ct)}{c s}}\right) &\leq \frac{1}{t^4}, \text{ and} \\
 \mathbb{P}\left(C_\alpha(i) > C_i(s_i) + \frac{2}{(1-\alpha)} \sqrt{\frac{\log(Ct)}{c s_i}}\right) &\leq \frac{1}{t^4}.
 \end{aligned}$$

414 Plugging the bounds on the events above and taking expectations on  $T_i(n)$  related inequality above,  
 415 we obtain

$$\mathbb{E}[T_i(n)] \leq u + \sum_{t=1}^{\infty} \sum_{s=1}^{t-1} \sum_{s_i=u}^{t-1} \frac{2}{t^4} \leq u + 2 \sum_{t=1}^{\infty} \frac{1}{t^2} \leq u + \frac{\pi^2}{3}. \quad (29)$$

416 The preceding analysis together with the fact that  $\mathbb{E}R_n = \sum_{i=1}^K \Delta_i \mathbb{E}[T_i(n)]$  leads to the first regret  
 417 bound presented in the theorem.

418 For inferring the second bound on the regret, i.e., the bound that does not scale inversely with the  
 419 gaps, observe that

$$\begin{aligned}
 \mathbb{E}R_n &= \sum_i \Delta_i \mathbb{E}[T_i(n)] = \sum_{i: \Delta_i \leq \lambda} \Delta_i \mathbb{E}[T_i(n)] + \sum_{i: \Delta_i \geq \lambda} \Delta_i \mathbb{E}[T_i(n)], \text{ for } \lambda > 0 \\
 &\leq n\lambda + \sum_{i: \Delta_i \geq \lambda} \left( \frac{16 \log(Cn)}{(1-\alpha)^2 \Delta_i} + \Delta_i \left( \frac{\pi^2}{3} + 1 \right) \right), \text{ (Using (29) and } \sum_{i: \Delta_i \leq \lambda} \mathbb{E}[T_i(n)] \leq n) \\
 &\leq n\lambda + \left( \frac{16K \log(Cn)}{(1-\alpha)^2 \lambda} \right) + \left( \frac{\pi^2}{3} + 1 \right) \sum_i \Delta_i, \\
 &\leq \frac{8}{(1-\alpha)} \sqrt{Kn \log(Cn)} + \left( \frac{\pi^2}{3} + 1 \right) \sum_i \Delta_i, \quad \left( \text{Using } \lambda = \frac{8\sqrt{K \log(Cn)}}{(1-\alpha)} \right).
 \end{aligned}$$

420

□
